# Supplementary material for: Intergenic Locations of Rice Centromeric Chromatin
Source: PubMed Central journal article supplement (PMC2586382; doi:10.1371/journal.pbio.0060286), 2008-11-25
Supplement: pbio.0060286.sg007.pdf [file pbio.0060286.sg007.pdf]

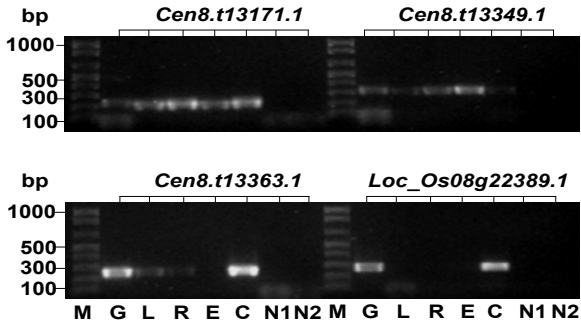

**Figure S7**
