# Supplementary material for: Intergenic Locations of Rice Centromeric Chromatin
Source: PubMed Central journal article supplement (PMC2586382; doi:10.1371/journal.pbio.0060286), 2008-11-25
Supplement: pbio.0060286.st001.pdf [file pbio.0060286.st001.pdf]

**Table S1. Primers Used in the Study**

| Primer No. | Primer Name <sup>a</sup>  | Sequence (5' to 3')             | Chr | Chr Start (bp) | Chr End (bp) | Strand | T <sub>m</sub> (°C) | PCR <sup>b</sup> |
|------------|---------------------------|---------------------------------|-----|----------------|--------------|--------|---------------------|------------------|
| 1          | <i>Cen4.t09693.IF1</i>    | ATGCTCATCGGGTGGTTTGATTT         | 4   | 9693110        | 9693132      | minus  | 64.6                | A, C             |
| 2          | <i>Cen4.t09693.IR1</i>    | CCACGATCAACATCTGACCTATGAAG      | 4   | 9692742        | 9692767      | plus   | 64                  | A                |
| 3          | <i>Cen4.t09693.IR2</i>    | ATATGGAGCACGATCTGCATTGTCA       | 4   | 9692928        | 9692952      | plus   | 65.6                | C                |
| 4          | <i>Cen8.t13171.IF1</i>    | CCATTTTGTGTGCTGATCCTCCT         | 8   | 13171179       | 13171202     | minus  | 64.4                | A, C             |
| 5          | <i>Cen8.t13171.IR1</i>    | GGCAACAGGACAGTAACTGAGTACC       | 8   | 13170991       | 13171016     | plus   | 64.6                | A                |
| 6          | <i>Cen8.t13171.IR2</i>    | CAATCACATGGCTACCCGTTCCG         | 8   | 13170862       | 13170883     | plus   | 65                  | C                |
| 7          | <i>Cen8.t13349.IF1</i>    | TGACTTTTCATAATGCCACGCAAG        | 8   | 13355941       | 13355964     | plus   | 64.3                | A, C             |
| 8          | <i>Cen8.t13349.IR1</i>    | ACTTGAAGAGCCTGGAATATGGTCT       | 8   | 13356222       | 13356247     | minus  | 65.2                | A, C             |
| 9          | <i>Cen8.t13363.IF1</i>    | CGTGGGTGGAAATCAGCAAATAT         | 8   | 13362928       | 13362951     | plus   | 64.4                | A, C             |
| 10         | <i>Cen8.t13363.IR1</i>    | TACCAACAAGAATCCGGTGCA           | 8   | 13363159       | 13363181     | minus  | 65                  | A, C             |
| 11         | <i>Cen8.t01075.IF2</i>    | CCCACATTTGATGCTAACATACTAACTAAC  | 8   | 13468687       | 13468717     | plus   | 64.2                | C                |
| 12         | <i>Cen8.t01075.IR2</i>    | CACATGACTGAGTCGTCGGGAAC         | 8   | 13468912       | 13468934     | minus  | 64.1                | C                |
| 13         | <i>LOC_Os05g22360.IF1</i> | AGTTGGGAGCGACCAAAAAGAGAAT       | 5   | 12587158       | 12587181     | minus  | 64.7                | A                |
| 14         | <i>LOC_Os05g22360.IR1</i> | TTACTCATACATGATTTTGAATGCATAA    | 5   | 12586461       | 12586488     | plus   | 60.1                | A                |
| 15         | <i>LOC_Os05g22360.IF2</i> | ATCTCCTTTGGAGCCTTGTTCAAAT       | 5   | 12586760       | 12586784     | plus   | 64                  | C                |
| 16         | <i>LOC_Os05g22360.IR2</i> | GAGACTGATTTAGCTTAAGAGGGTGCAT    | 5   | 12587010       | 12587037     | minus  | 64.6                | C                |
| 17         | <i>LOC_Os08g22389.IF1</i> | GCTTTTAAAGGAGCTCCATGTCTAACTTC   | 8   | 13372773       | 13372801     | plus   | 65.5                | A, C             |
| 18         | <i>LOC_Os08g22389.IR1</i> | TCAGAGAAAAGCATTTTGTGAATTTCTTA   | 8   | 13373007       | 13373035     | minus  | 64                  | A, C             |
| 19         | <i>LOC_Os08g22700.IF1</i> | GATGATGGCCAGCACTTCGTCTT         | 8   | 13520177       | 13520199     | plus   | 65.3                | A, C             |
| 20         | <i>LOC_Os08g22700.IR1</i> | ACGTCCAGAACGTCGTCATCCTC         | 8   | 13520852       | 13520874     | minus  | 65                  | A                |
| 21         | <i>LOC_Os08g22700.IR2</i> | GGTCTAAAAAACGTCATAAAATATCTGATGG | 8   | 13520375       | 13520405     | minus  | 65.1                | C                |
| 22         | <i>LOC_Os02g28600.IF1</i> | CCACAGAATTGACAGTAGCAAGCGTC      | 2   | 16919285       | 16919310     | plus   | 66.5                | A                |
| 23         | <i>LOC_Os02g28600.IR1</i> | CATTCTTTCGTGATGGATCATGTG        | 2   | 16919404       | 16919427     | minus  | 64.9                | A                |
| 24         | <i>LOC_Os08g29910.IF1</i> | CAGGCCTCTGCATCAGGTATTCT         | 8   | 18245350       | 18245373     | plus   | 63.9                | A                |
| 25         | <i>LOC_Os08g29910.IR1</i> | AACTTGCCATGCTAAGTGCGC           | 8   | 18246434       | 18246454     | minus  | 62.9                | A                |
| 26         | <i>LOC_Os08g23570.IF1</i> | GTTCTGTTGCTGTGGATGATTATCTGG     | 8   | 14128866       | 14128892     | minus  | 65.4                | A                |
| 27         | <i>LOC_Os08g23570.IR1</i> | GCGTGGGCATAGCTTGAGTGC           | 8   | 14128482       | 14128502     | plus   | 65.3                | A                |
| 28         | <i>LOC_Os09g09460.IF3</i> | CAACTCCAACGACCTGACGCTC          | 9   | 5090004        | 5090025      | minus  | 64.3                | A                |
| 29         | <i>LOC_Os09g09460.IR3</i> | CACGTTCTTGAACCCCTGGTAGAA        | 9   | 5089851        | 5089874      | plus   | 64.5                | A                |
| 30         | <i>Cen4.t09695.IψF1</i>   | ACTAGGGTACGACGGCGCAAAT          | 4   | 9694505        | 9694526      | plus   | 64.9                | A                |
| 31         | <i>Cen4.t09695.IψR1</i>   | CGTCACTGTCGACCACGACCA           | 4   | 9694636        | 9694656      | minus  | 64.7                | A                |
| 32         | <i>Cen7.t12104.IψF1</i>   | CATCGCTCGGGAACACACTTG           | 7   | 12103765       | 12103785     | plus   | 63.6                | A                |
| 33         | <i>Cen7.t12104.IψR1</i>   | TTCAGTCTCGAAATACCACAGGTT        | 7   | 12104968       | 12104992     | minus  | 63.4                | A                |
| 34         | <i>Cen7.t12284.IψF1</i>   | CATCGGAGTTCCTGCGCCATATC         | 7   | 12283821       | 12283844     | plus   | 66.6                | A                |
| 35         | <i>Cen7.t12284.IψR1</i>   | CGTAGCCATCTGGGTCCACATCA         | 7   | 12285359       | 12285381     | minus  | 66.6                | A                |
| 36         | <i>Cen8.t13108.IψF1</i>   | CGAGACGACCACAGGGAGGTGA          | 8   | 13108502       | 13108523     | plus   | 66.7                | A                |
| 37         | <i>Cen8.t13108.IψR1</i>   | GTCGGCCGTCGTTTTTGGTC            | 8   | 13108674       | 13108693     | minus  | 64.9                | A                |
| 38         | <i>Cen8.t13376.IψF1</i>   | CAGTGCTCCAATGGTGGAAACG          | 8   | 13376169       | 13376192     | minus  | 63.5                | A                |
| 39         | <i>Cen8.t13376.IψR1</i>   | GGTCGTGGCTAAGCTTCTGCTATC        | 8   | 13376054       | 13376074     | plus   | 63.9                | A                |
| 40         | <i>Cen8.t00793.IF3</i>    | TTGATAAGCACCCACAGTTCAGAAAGT     | 8   | 12960403       | 12960429     | minus  | 64.9                | B                |
| 41         | <i>Cen8.t00793.IR3</i>    | TTCGCTTGAAATGTTCTCGTATAAATCTC   | 8   | 12960271       | 12960299     | plus   | 65.2                | B                |
| 42         | <i>LOC_Os09g02440.IF3</i> | TTGTAAGCACCTGATTCAGGA           | 9   | 1006208        | 1006231      | minus  | 64.9                | B                |

|    |                           |                                |   |          |          |       |      |   |
|----|---------------------------|--------------------------------|---|----------|----------|-------|------|---|
| 43 | <i>LOC_Os09g02440.1R3</i> | CGGGTGAGATGATTCTGTATAAAATCG    | 9 | 1006075  | 1006101  | plus  | 64.7 | B |
| 44 | <i>Cen8.t00941.1F4</i>    | TCCTTGAAACTAAGTACCGCAGGTTA     | 8 | 13234373 | 13234398 | plus  | 63.2 | B |
| 45 | <i>Cen8.t00941.1R3</i>    | CAAAGTTCACCTTCAAACCTTTTCTTAATT | 8 | 13234550 | 13234579 | minus | 63.5 | B |
| 46 | <i>LOC_Os09g02710.1F4</i> | TGCTACTTGAAACCAAATATCGCAGA     | 9 | 1220692  | 1220717  | minus | 64.6 | B |
| 47 | <i>LOC_Os09g02710.1R3</i> | TAAGCAGTTTCTTCAGCTGTCTTCTTTATT | 9 | 1220511  | 1220540  | plus  | 64.1 | B |
| 48 | <i>Cen8.t00960.1F3</i>    | CTTAAGGGGCAAATGGAATCGC         | 8 | 13260990 | 13261011 | minus | 64.9 | B |
| 49 | <i>Cen8.t00960.1R3</i>    | GGTTTCTAACTTGTCTTGGAAGCTCAGC   | 8 | 13260858 | 13260885 | plus  | 64.8 | B |
| 50 | <i>LOC_Os09g03090.1F3</i> | CTCTGTGTATAAGGAACAGTTTGAAGCAA  | 9 | 1463974  | 1464002  | minus | 64.2 | B |
| 51 | <i>LOC_Os09g03090.1R3</i> | CCAGGCTTCTAATTTGCTCTTGGT       | 9 | 1463836  | 1463859  | plus  | 63.4 | B |
| 52 | <i>Cen8.t01249.1F3</i>    | GATATCATTTCTGTGCGAGGGCCTC      | 8 | 13780684 | 13780707 | minus | 63.2 | B |
| 53 | <i>Cen8.t01249.1R3</i>    | TCACCTTATAAGGATGCATCTGATTGG    | 8 | 13780582 | 13780608 | plus  | 63.3 | B |
| 54 | <i>LOC_Os09g02270.1F3</i> | GTCATCCTGTGGAAGCCTTACATTTA     | 9 | 919988   | 920014   | minus | 64.5 | B |
| 55 | <i>LOC_Os09g02270.1R3</i> | TACTTGATGAGAATACATCTTGCCGG     | 9 | 919893   | 919918   | plus  | 63.9 | B |
| 56 | <i>Cen8.t01492.1F3</i>    | CAGTTGTGGATGGCCCTAATGTG        | 8 | 14220552 | 14220574 | plus  | 64.1 | B |
| 57 | <i>Cen8.t01492.1R3</i>    | GAAATTGCCAGGTAATGTGCTCTTC      | 8 | 14220826 | 14220850 | minus | 63.6 | B |
| 58 | <i>LOC_Os09g09980.1F3</i> | CCGTTGTAGATGGTCCTAACACA        | 9 | 5431231  | 5431254  | plus  | 63   | B |
| 59 | <i>LOC_Os09g09980.1R3</i> | TCTCAAAGTTCCAGGTAGTATGCTCTTT   | 9 | 5431506  | 5431534  | minus | 64.3 | B |
| 60 | <i>Cen8.t01528.1F3</i>    | TGCAGCTACCGGTATGCAGATG         | 8 | 14282244 | 14282265 | plus  | 63.6 | B |
| 61 | <i>Cen8.t01528.1R3</i>    | GAAGAACCAAGAGGGCTGGAGTAG       | 8 | 14282385 | 14282408 | minus | 62.8 | B |
| 62 | <i>LOC_Os09g10600.1F3</i> | CAGTGACTACTGGCTTGCAGATGG       | 9 | 5781545  | 5781568  | plus  | 63.8 | B |
| 63 | <i>LOC_Os09g10600.1R3</i> | AGAGAAACAAACGGCCCTGCT          | 9 | 5781690  | 5781710  | minus | 62.9 | B |
| 64 | <i>Cen8.t01562.1F3</i>    | TGGGCTTCAGGCAGATATGGTG         | 8 | 14344933 | 14344954 | plus  | 64.8 | B |
| 65 | <i>Cen8.t01562.1R3</i>    | TGCCTTTTGTACCAGGTGGAGCTA       | 8 | 14345127 | 14345150 | minus | 65.1 | B |
| 66 | <i>LOC_Os09g10710.1F3</i> | AGGGCCTCAAGCAATGTTACCC         | 9 | 5840681  | 5840702  | minus | 64.3 | B |
| 67 | <i>LOC_Os09g10710.1R3</i> | GCTCCTGATGAAGCTCCCTTTTTAG      | 9 | 5840499  | 5840523  | plus  | 64.4 | B |
| 68 | <i>Cen8.t01706.1F3</i>    | TGAAGAAATTAAGCACCTTGTACGG      | 8 | 14608399 | 14608424 | plus  | 65.2 | B |
| 69 | <i>Cen8.t01706.1R3</i>    | AATCATGAAAGGATTGTCAGCCACAG     | 8 | 14608663 | 14608688 | minus | 65.7 | B |
| 70 | <i>LOC_Os09g10960.1F3</i> | AGTTGAATGCAAGCGTGCGGTA         | 9 | 6046381  | 6046402  | minus | 65.4 | B |
| 71 | <i>LOC_Os09g10960.1R3</i> | CACCATGAAGGGATTCTCAGAAACTG     | 9 | 6046119  | 6046144  | plus  | 65.4 | B |
| 72 | 1_17170F1                 | AGAGTTACTCGACAAGGGTCGTGCT      | 1 | 17170240 | 17170264 | plus  | 65   | C |
| 73 | 1_17170R1                 | AAATCTCCATACGAGCTCCGTTTTTC     | 1 | 17170461 | 17170485 | minus | 65   | C |
| 74 | 1_17209F1                 | AGGGCGTCTCCCTCTGTTTAGAGT       | 1 | 17208962 | 17208986 | plus  | 67.1 | C |
| 75 | 1_17209R1                 | GGCCCACGAGTACTTGATAGAAAGC      | 1 | 17209145 | 17209169 | minus | 64.9 | C |
| 76 | 1_17255F1                 | TGCATTCTGGATACGCTCTTCTCTC      | 1 | 17255541 | 17255565 | plus  | 64.2 | C |
| 77 | 1_17255R1                 | CCAGTAGCGGAAAGATGAGTTGCT       | 1 | 17255810 | 17255833 | minus | 64.1 | C |
| 78 | 3_18741F1                 | CGACCGTATCACCTAACCTAGTCTGA     | 3 | 18740551 | 18740576 | plus  | 63.3 | C |
| 79 | 3_18741R1                 | GAAAAAGTAAATCAAAGATCCATCTACTCC | 3 | 18740798 | 18740827 | minus | 62.9 | C |
| 80 | 3_18746F1                 | ACGGCCTTTTTGGTGATTTCTCTC       | 3 | 18745855 | 18745878 | plus  | 65.1 | C |
| 81 | 3_18746R1                 | CCAAAGAGTTCAGCGCTAGATTCAA      | 3 | 18746143 | 18746167 | minus | 64.4 | C |
| 82 | 3_19270F1                 | GAAGTCAAATCCAAATAAAATAGGCGA    | 3 | 19269862 | 19269888 | plus  | 64   | C |
| 83 | 3_19270R1                 | TCGAAGGGCATGCGTCTGAGTAAT       | 3 | 19270102 | 19270125 | minus | 67.1 | C |
| 84 | 3_19501F1                 | GCATGTGTGTGGATTGTAGAGCAA       | 3 | 19501386 | 19501409 | plus  | 62.6 | C |
| 85 | 3_19501R1                 | TTAATCTCATGAAAGTACTGGGTGCAT    | 3 | 19501617 | 19501643 | minus | 62.9 | C |
| 86 | 9_02737F1                 | GCCTAATTTCAAGTCCGTATGACAAAG    | 9 | 2737139  | 2737165  | plus  | 64.3 | C |
| 87 | 9_02737R1                 | TAGAGTTTCGAGTCTTGCCACCAC       | 9 | 2737354  | 2737378  | minus | 64   | C |

|     |            |                              |    |          |          |       |      |   |
|-----|------------|------------------------------|----|----------|----------|-------|------|---|
| 88  | 9_02747F1  | TCAACGGAGTAGGAAACCGTCAGT     | 9  | 2747689  | 2747712  | plus  | 64.1 | C |
| 89  | 9_02747R1  | ATCGAGCAGGTGATTGTGGGACA      | 9  | 2747927  | 2747949  | minus | 66.2 | C |
| 90  | 9_02943F1  | CAAAACTCCTTTGGTTTCTGATGGA    | 9  | 2942575  | 2942599  | plus  | 63.8 | C |
| 91  | 9_02943R1  | TGATGTTGAGGAAGAGTCGGCTAAG    | 9  | 2942830  | 2942854  | minus | 64.1 | C |
| 92  | 10_07719F1 | TGGAAACGGCTAAGTCAAGTTGTTC    | 10 | 7719312  | 7719336  | plus  | 64.1 | C |
| 93  | 10_07719R1 | TAGCCTGAGTTGCCTGTAATCGTTC    | 10 | 7719499  | 7719523  | minus | 64.2 | C |
| 94  | 10_07730F1 | ACGAATGAGAACCATGGCCGAAG      | 10 | 7729792  | 7729814  | plus  | 67.2 | C |
| 95  | 10_07730R1 | CCACCGCTGCTTCTTCCACTACTC     | 10 | 7729976  | 7729999  | minus | 66.4 | C |
| 96  | 10_07754F1 | CTCCACGACGCCCTCAAAATAATAA    | 10 | 7753544  | 7753568  | plus  | 65.9 | C |
| 97  | 10_07754R1 | CATCAGTCCTTGATTCAATGGCAAG    | 10 | 7753739  | 7753763  | minus | 64.9 | C |
| 98  | 10_07921F1 | GTTGCCGATAGTTTTTTGTGAGTTGC   | 10 | 7921793  | 7921817  | plus  | 64.4 | C |
| 99  | 10_07921R1 | CACAGAAAATCTTATCTCAAACGGACAA | 10 | 7922089  | 7922116  | minus | 64.6 | C |
| 100 | 10_07926F1 | CCGACTCCTAAAACGGTCTCACAAAG   | 10 | 7925537  | 7925561  | plus  | 65.6 | C |
| 101 | 10_07926R1 | TCTTATTTAAAATCGGGAAGTTGGAGGA | 10 | 7925730  | 7925756  | minus | 65.3 | C |
| 102 | 12_11962F1 | GCATGGGGTACCCAAGAAGATTGTA    | 12 | 11962176 | 11962200 | plus  | 65.5 | C |
| 103 | 12_11962R1 | GGCTTGGTAGCTGTTGTTGTACGAG    | 12 | 11962404 | 11962428 | minus | 64.5 | C |
| 104 | 12_12007F1 | GGACATCAACACCATCGATACATCC    | 12 | 12007093 | 12007117 | plus  | 64.3 | C |
| 105 | 12_12007R1 | AAATCGGAGTTCGCATGAAGTCGT     | 12 | 12007339 | 12007362 | minus | 66.2 | C |
| 106 | 12_12009F1 | TTTAGCCATTGCTACTTGCTTGACAG   | 12 | 12008614 | 12008638 | plus  | 65.3 | C |
| 107 | 12_12009R1 | CCGACTACAACCCTACAAGACGTTG    | 12 | 12008839 | 12008863 | minus | 64.3 | C |
| 108 | 12_12010F1 | TCAGAGTTGTGCATGAGTTGTTCT     | 12 | 12009951 | 12009975 | plus  | 62.9 | C |
| 109 | 12_12010R1 | GATGTACACCGACTGAACCAAGCAC    | 12 | 12010204 | 12010228 | minus | 64.8 | C |

<sup>a</sup>F1 to F4: forward primer; R1 to R4: reverse primer.

<sup>b</sup>A: RT-PCR; B: real-time RT-PCR; C: ChIP real-time PCR.
