# Supplementary material for: Intergenic Locations of Rice Centromeric Chromatin
Source: PubMed Central journal article supplement (PMC2586382; doi:10.1371/journal.pbio.0060286), 2008-11-25
Supplement: pbio.0060286.st002.pdf [file pbio.0060286.st002.pdf]

**Table S2.** Forty-three Regions from *Cen8* that Matched Active Genes<sup>a</sup> Elsewhere in the Genome

| <b>Category</b>                   | <b>Total Regions</b> | <b>Deterioration<sup>b</sup></b> |
|-----------------------------------|----------------------|----------------------------------|
| Intergenic                        | 15 <sup>c</sup>      | 13 <sup>c</sup>                  |
| Active gene <sup>a</sup> , exon   | 17                   | 1                                |
| Best match                        | 12                   | 0                                |
| Not best match                    | 5                    | 1                                |
| Active gene <sup>a</sup> , intron | 2                    | 2                                |
| Inactive gene, exon               | 6                    | 6                                |
| Non-coding                        | 3                    | 3                                |
| Total                             | 43 <sup>c</sup>      | 25 <sup>c</sup>                  |

<sup>a</sup>Active genes are either supported by ESTs/cDNAs or were verified by RT-PCR.

<sup>b</sup>Deterioration: the presence of premature stop codon, frame shift, or truncation of CDS.

<sup>c</sup>Three of these regions were in the CENH3 subdomains.
