# Supplementary material for: Intergenic Locations of Rice Centromeric Chromatin
Source: PubMed Central journal article supplement (PMC2586382; doi:10.1371/journal.pbio.0060286), 2008-11-25
Supplement: pbio.0060286.st003.pdf [file pbio.0060286.st003.pdf]

**Table S3.** Fourteen Pairs of Duplicated Genes in Nipponbare and Their Respective Orthologs in Two Wild Rice Species

| <i>Cen8</i> gene     |                       |                     |                                     |                      |                                   |                      | <i>Chr9</i> paralog     |                       |                     |                                          |                      |                                   |                      |
|----------------------|-----------------------|---------------------|-------------------------------------|----------------------|-----------------------------------|----------------------|-------------------------|-----------------------|---------------------|------------------------------------------|----------------------|-----------------------------------|----------------------|
| Name                 | Genomic DNA size (bp) | Protein length (aa) | <i>O. brachyantha</i> GSS accession | Protein identity (%) | <i>O. granulata</i> GSS accession | Protein identity (%) | Name                    | Genomic DNA size (bp) | Protein length (aa) | <i>O. brachyantha</i> GSS accession      | Protein identity (%) | <i>O. granulata</i> GSS accession | Protein identity (%) |
| <i>Cen8.t00793.1</i> | 4612                  | 192                 | -                                   |                      |                                   |                      | <i>LOC_Os09g02440.1</i> | 5755                  | 159                 |                                          |                      |                                   |                      |
| <i>Cen8.t00941.1</i> | 8518                  | 235                 |                                     |                      |                                   |                      | <i>LOC_Os09g02710.1</i> | 3691                  | 227                 | CL547383.1                               | 89                   |                                   |                      |
| <i>Cen8.t00960.1</i> | 5945                  | 279                 |                                     |                      |                                   |                      | <i>LOC_Os09g03090.1</i> | 6115                  | 269                 |                                          |                      |                                   |                      |
| <i>Cen8.t01003.1</i> | 7461                  | 660                 |                                     |                      |                                   |                      | <i>LOC_Os09g02700.1</i> | 5156                  | 662                 |                                          |                      | DU818528.1                        | 95                   |
| <i>Cen8.t01249.1</i> | 6852                  | 270                 |                                     |                      |                                   |                      | <i>LOC_Os09g02270.1</i> | 5451                  | 267                 |                                          |                      |                                   |                      |
| <i>Cen8.t01272.1</i> | 3911                  | 384                 | CL583551.1                          | 78                   |                                   |                      | <i>LOC_Os09g08130.2</i> | 3349                  | 381                 |                                          |                      |                                   |                      |
| <i>Cen8.t01289.1</i> | 3051                  | 415                 |                                     |                      | CZ155639.1                        | 92                   | <i>LOC_Os09g07350.1</i> | 3718                  | 401                 | EI043679.1                               | 98                   |                                   |                      |
| <i>Cen8.t01413.1</i> | 901                   | 150                 |                                     |                      |                                   |                      | <i>LOC_Os09g09460.1</i> | 1469                  | 339                 | CL543704.1                               | 90                   |                                   |                      |
| <i>Cen8.t01492.1</i> | 5235                  | 499                 |                                     |                      |                                   |                      | <i>LOC_Os09g09980.1</i> | 2340                  | 488                 | CL572619.1,<br>CL574365.1,<br>CL541635.1 | 95-97                | DU656519.1,<br>DX119853.1         | 97                   |
| <i>Cen8.t01528.1</i> | 4656                  | 375                 |                                     |                      | DU650525.1                        | 88                   | <i>LOC_Os09g10600.1</i> | 4201                  | 371                 | CL576330.1                               | 85                   | DX120313.1                        | 96.7                 |
| <i>Cen8.t01548.1</i> | 824                   | 150                 | CL547680.1                          | 76                   |                                   |                      | <i>LOC_Os09g10620.1</i> | 558                   | 185                 |                                          |                      |                                   |                      |
| <i>Cen8.t01562.1</i> | 6365                  | 458                 | CL571360.2                          | 90                   | DU652035.1                        | 95                   | <i>LOC_Os09g10710.1</i> | 7239                  | 409                 | EI046664.1,<br>EI046356.1                | 84-91                |                                   |                      |
| <i>Cen8.t01706.1</i> | 20851                 | 1657                | CL561448.1,<br>CL597792.1           | 92-96                |                                   |                      | <i>LOC_Os09g10960.1</i> | 11395                 | 1740                |                                          |                      | DU156458.1,<br>DU816804.1         | 93-100               |
| <i>Cen8.t01718.1</i> | 5977                  | 481                 | CL589336.1                          | 79                   |                                   |                      | <i>LOC_Os09g10950.1</i> | 4043                  | 440                 |                                          |                      |                                   |                      |

Orthologs were identified by Tblastn against *O. brachyantha* and *O. granulata* genome survey sequences (GSS) available in GenBank.
