# Supplementary material for: Intergenic Locations of Rice Centromeric Chromatin
Source: PubMed Central journal article supplement (PMC2586382; doi:10.1371/journal.pbio.0060286), 2008-11-25
Supplement: pbio.0060286.st005.pdf [file pbio.0060286.st005.pdf]

**Table S5.** Eight Pseudogenes Identified from the CENH3 ChIP-Seq Peaks

| Pseudogene             | Chr start (bp) | Chr end (bp) | Length (bp) | Deterioration        | Expression <sup>a</sup> | Coverage of parent protein (%) | Parent gene             | No. coding exon |
|------------------------|----------------|--------------|-------------|----------------------|-------------------------|--------------------------------|-------------------------|-----------------|
| <i>Cen4.t09593.1</i> ψ | 1222768        | 1222974      | 207         | Truncated CDS        | NA                      | 49                             | <i>LOC_Os01g37280.1</i> | 1               |
| <i>Cen4.t09695.1</i> ψ | 1324491        | 1324943      | 453         | Premature stop codon | No                      | 50                             | <i>LOC_Os04g32240.1</i> | 3               |
| <i>Cen7.t12104.1</i> ψ | 12103758       | 12105033     | 1276        | Premature stop codon | No                      | 46                             | <i>LOC_Os12g37519.1</i> | 3               |
| <i>Cen7.t12280.1</i> ψ | 12281185       | 12282756     | 1572        | Frame shift          | NA                      | 49                             | <i>LOC_Os12g44100.1</i> | 2               |
| <i>Cen7.t12284.1</i> ψ | 12283786       | 12285419     | 1634        | Not found            | No                      | 91                             | <i>LOC_Os01g28970.2</i> | 2               |
| <i>Cen8.t13108.1</i> ψ | 13108381       | 13108698     | 318         | Premature stop codon | No                      | 66                             | <i>LOC_Os05g10754.1</i> | 1               |
| <i>Cen8.t13153.1</i> ψ | 13152862       | 13153173     | 312         | Truncated CDS        | NA                      | 83                             | <i>LOC_Os09g06570.1</i> | 1               |
| <i>Cen8.t13376.1</i> ψ | 13375898       | 13376350     | 453         | Truncated CDS        | No                      | 88                             | <i>LOC_Os01g28970.1</i> | 1               |

<sup>a</sup>Five pseudogenes were tested for expression, none of them were found to be transcribed in leaves, roots, etiolated leaves/shoots and calli.

NA: expression not tested.
